# Supplementary material for: Ratiometric fluorescent and colorimetric dual-modal sensing strategy for discrimination and detection of D2O from H2O
Source: Royal Society of Chemistry journal article supplement (doi:10.1039/d2cc03530h), 2022-01-01
Supplement: d2cc03530h1.pdf [file d2cc03530h1.pdf]

Electronic Supplementary Information

**Ratiometric Fluorescent and Colorimetric Dual-Modal Sensing Strategy for  
Discrimination and Detection of D<sub>2</sub>O from H<sub>2</sub>O**

Jingda Liu,<sup>a</sup> Xinyu Ma,<sup>b</sup> Qi Song,<sup>a</sup> Junying Zang,<sup>a</sup> Jingcheng Hao,<sup>a</sup> Weisheng Liu,<sup>b</sup>  
and Jie Jiang<sup>a, c\*</sup>

<sup>a</sup> Key Laboratory of the Colloid and Interface Chemistry of the Ministry of Education,  
School of Chemistry and Chemical Engineering, Shandong University, Jinan, 250100,  
China.

<sup>b</sup> State Key Laboratory of Applied Organic Chemistry, Key Laboratory of Nonferrous  
Metal Chemistry and Resources Utilization of Gansu Province, and College of  
Chemistry and Chemical Engineering, Lanzhou University, Lanzhou, 730099, China.

<sup>c</sup> Shenzhen Research Institute of Shandong University, Shenzhen 518057, P. R.  
China.

Corresponding author. \*Email: jiejiang@sdu.edu.cn

## Table of Contents

|                                                                                  |        |
|----------------------------------------------------------------------------------|--------|
| 1. General information .....                                                     | S3     |
| 2. General procedure for preparation of compound <b>HTI</b> and <b>MTI</b> ..... | S3-S4  |
| 3. Experimental section.....                                                     | S4-S5  |
| 4. Determination of the $pK_a$ of sensor <b>HTI</b> .....                        | S5     |
| 5. Determination of the detection limit.....                                     | S5-S6  |
| 6. Spiked recovery experiments.....                                              | S6     |
| 7. Additional discussion.....                                                    | S6-S7  |
| 8. Supplementary tables (Tables S1-S6) and figures (Figures S1-S13).....         | S8-S19 |
| 9. References.....                                                               | S20    |

## Experimental Procedures

### 1. General Information

All reagents and solvents were obtained commercially and used without further purification unless otherwise noted. Analytical thin-layer chromatography (TLC) was performed on a silica gel plate and analyzed by UV light or by potassium permanganate stains followed by heating. Flash chromatography was carried out utilizing silica gel (200-300 mesh).  $^1\text{H}$  NMR and  $^{13}\text{C}$  NMR spectra were recorded in  $\text{DMSO-}d_6$  at room temperature on a Bruker AM-400 spectrometer (400 MHz  $^1\text{H}$ , 100 MHz  $^{13}\text{C}$ ) unless otherwise noted. Data for  $^1\text{H}$  NMR are reported as follows: chemical shift ( $\delta$  ppm), multiplicity (s = singlet, d = doublet, t = triplet, m = multiplet, dd = doublet doublet), coupling constants (Hz), integration. Data for  $^{13}\text{C}$  NMR are reported as chemical shifts. HRMS were performed on a Bruker Apex II mass instrument (ESI).

All UV-visible spectra and fluorescence spectra were recorded using a Hitachi UV-2910 spectrophotometer and Hitachi F-7100 luminescence spectrometer, respectively. All fluorescence lifetime measurements were recorded by using the FLIM equipment consisting of the confocal optical microscope (Nanofinder FLEX2, Tokyo Instruments, Inc.) and a time-correlated single-photon counting (TCSPC) module (Becker & Hickl, SPC-150). Fluorescent quantum yields were determined to be 0.04% for **HTI** in  $\text{H}_2\text{O}$ , and 1.56% in  $\text{D}_2\text{O}$ , respectively by an absolute method using an integrating sphere on FLS920 of Edinburgh Instrument.

### 2. General Procedure for Preparation of Compound HTI and MTI

#### Scheme S1. Synthesis of HTI.

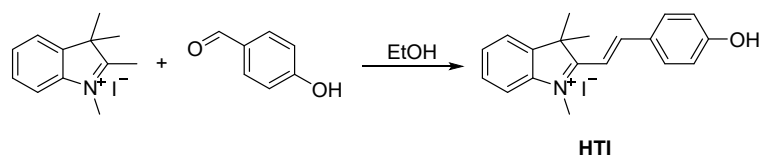

#### 2-[(*E*)-2-(4-hydroxyphenyl)ethenyl]-1,3,3-trimethyl-3*H*-indol-1-ium iodide (HTI)

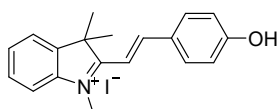

1,2,3,3-tetramethyl-3*H*-indoleiodide (903.5 mg, 3.0 mmol) and *p*-hydroxybenz-aldehyde (439.6 mg, 3.6 mmol) were added into 40 mL ethanol in a 100 mL Schlenk flask. The mixture was stirred and refluxed for 12h under an argon atmosphere. The process of the reaction was monitored by thin-layer chromatography (TLC). After cooling to room temperature, the reaction mixture was filtered, washed

with petroleum ether, and dried to afford an orange-red solid, no further purification was needed (968.8 mg, 79.7%). The NMR data is agreed with that in the previously reported literature.<sup>1</sup>

### Scheme S2. Synthesis of MTI.

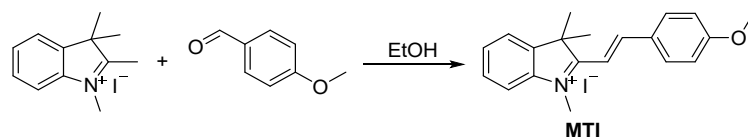

#### (E)-2-(4-methoxystyryl)-1,3,3-trimethyl-3H-indol-1-ium (MTI)

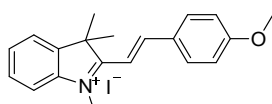

The synthesis of **MTI** was performed according to the reported literature by using 1,2,3,3-tetramethyl-3H-indoleiodide (903.5 mg, 3.0 mmol) and 4-methoxybenzaldehyde (489.6 mg, 3.6 mmol) with a yield of 72.6%.<sup>2</sup>

## 3. Experimental Section

### 3.1 General Procedure for Sensing Studies

Stock solutions of **HTI** and **MTI** (10 mM) were prepared in DMSO. Freshly prepared **HTI** or **MTI** (4  $\mu$ L) was diluted to 20  $\mu$ M to collect the spectrum at room temperature. Solutions of NaCl, KCl, CaCl<sub>2</sub>, Mg(ClO<sub>4</sub>)<sub>2</sub>, Zn(ClO<sub>4</sub>)<sub>2</sub>, Cu(ClO<sub>4</sub>)<sub>2</sub>, and Na<sub>2</sub>SO<sub>4</sub> were prepared by dissolving their salts into distilled water.

D<sub>2</sub>O and distilled H<sub>2</sub>O samples were commercially available and stored in either glass or plastic bottles. Before the discrimination experiment and quantitative analysis measurement, freshly opened D<sub>2</sub>O and H<sub>2</sub>O were distilled and subsequently treated with degas and protection with N<sub>2</sub> atmosphere and stored in glass vessels.

### 3.2 Detailed Protocols for pH Effects

Different pH values of Britton–Robinson (B–R) buffer (pH 3.00 – 11.00) were prepared. The solution for spectroscopic determination was obtained by diluting 4  $\mu$ L of the stock solution to get a 20  $\mu$ M solution in different pH of B–R buffer.

### 3.3 <sup>1</sup>H NMR Titration

<sup>1</sup>H NMR spectrum was sequentially recorded for **HTI** (15 mg, 0.037 mmol) dissolved in DMSO-*d*<sub>6</sub> (0.6 mL), followed by the addition of 10 eq Et<sub>3</sub>N (0.37 mmol, 51.3  $\mu$ L) to adjust the pH value of the above solution, and further treated with 20 eq HCl (0.74 mmol, 64.5  $\mu$ L) to reinstall the pH value.

### 3.4 <sup>1</sup>H NMR of HTI in D<sub>2</sub>O and H<sub>2</sub>O

<sup>1</sup>H NMR of **HTI** (0.2 mM) was conducted in degassed pure H<sub>2</sub>O and D<sub>2</sub>O (0.5 mL, containing 1% DMSO as cosolvent) with D<sub>2</sub>O as an external standard.

### 3.5 NaOH, DCl, and HCl Titration Experiment

Freshly prepared NaOH (0.1 M in H<sub>2</sub>O, 0 – 6 μL) was added to a solution of **HTI** in H<sub>2</sub>O (20 μM). Both absorption and fluorescence spectra were collected after each addition. Similar experiments were conducted by titrating freshly prepared DCl (0.1 M, 0 – 5 μL) or HCl (0.1 M, 0 – 5 μL) into the D<sub>2</sub>O solution of **HTI** (20 μM), respectively.

### 4. Determination of the pK<sub>a</sub> of Sensor HTI

The pK<sub>a</sub> value of **HTI** was determined by the Henderson-Hasselbalch equation:<sup>2</sup>

$$\log[(R_{\max} - R)/(R - R_{\min})] = \text{p}K_a - \text{pH}$$

Where R is the fluorescence intensity ratio between 558 and 540 nm, R<sub>max</sub> (or R<sub>min</sub>) is the corresponding maximum (or minimum) limiting values of R. R represents the observed value. The pK<sub>a</sub> value was then calculated based on the plots of log[(R<sub>max</sub> - R)/(R - R<sub>min</sub>)] vs. pH as shown in Fig. 2e.

Based on the experiment on the pH effect on emission, the pK<sub>a</sub> value of **HTI** was calculated to be 7.11 in the B–R buffer (containing 0.2 % DMSO) system.

### 5. Determination of the Detection Limit

The detection limit was calculated based on the fluorescence and absorption titration, respectively. Fluorescence emission spectrum or absorption of sensor **HTI** in D<sub>2</sub>O solution was measured by thirty times and the standard deviation (σ) of this blank measurement was achieved. The slope (k) was derived from the calibration curve for quantitative analysis of H<sub>2</sub>O. The detection limit was determined with the following equation:<sup>3</sup>

$$\text{Detection limit} = 3\sigma/k.$$

Based on the absorption titration experiment shown in Fig. 4a and 4b, the detection limit value of H<sub>2</sub>O was calculated to be 0.196% in D<sub>2</sub>O (containing 0.2% DMSO).

$$\text{Detection limit of H}_2\text{O} = 3 * 0.000778/1.19258 = 0.001958 = 0.196\% \text{ (v/v)}$$

Based on the fluorescence titration experiment shown in Fig. 4c and 4d, the detection limit value of H<sub>2</sub>O was calculated to be 0.738% in D<sub>2</sub>O (containing 0.2% DMSO).

$$\text{Detection limit of H}_2\text{O} = 3 * 0.002373/0.97188 = 0.00732 = 0.732\% \text{ (v/v)}$$

A similar method was performed to determine the detection limit of D<sub>2</sub>O in H<sub>2</sub>O according to the data in Fig. 5 of the main article.

Based on the absorption titration experiment shown in Fig. 4a and 4b, the detection limit value of D<sub>2</sub>O

was calculated to be 0.597% in H<sub>2</sub>O (containing 0.2% DMSO).

$$\text{Detection limit of D}_2\text{O} = 3 \times 0.002373 / 1.19258 = 0.005969 = 0.597\% \text{ (v/v)}$$

Based on the fluorescence titration experiment shown in Fig. 4c and 4d, the detection limit value of D<sub>2</sub>O was calculated to be 1.604% in H<sub>2</sub>O (containing 0.2% DMSO).

$$\text{Detection limit of D}_2\text{O} = 3 \times 0.00516 / 0.97188 = 0.01593 = 1.593\% \text{ (v/v)}$$

## 6. Spiked Recovery Experiments

Spiked recovery experiments were carried out based on the absorption method. Firstly, freshly prepared D<sub>2</sub>O and H<sub>2</sub>O were degassed and protected with N<sub>2</sub>, which were mixed to obtain different fractions of H<sub>2</sub>O in 2 mL of D<sub>2</sub>O-H<sub>2</sub>O solution in total, labeled as samples 1 – 8, and the content was labeled as “spiked%”, as shown in Table S1.

HTI (4 μL) was added to 2 mL of the above samples (1-8) to collect the absorption spectrum at room temperature. The absorption ratio ( $A_{520 \text{ nm}}/A_{452 \text{ nm}}$ ) was determined to be the value  $y$  for each sample, which could be used to calculate the value  $x$  based on the linear relationship from Fig. 4b:

$$y = 1.19258 x + 1.05082$$

The data list in Table 1 in the main manuscript was calculated using the following equation:

For samples 1-4,

$$\text{Measured\%} = x \times 100;$$

For samples 5-8,

$$\text{Measured\%} = (1 - x) \times 100.$$

$$\text{Recovery\%} = (\text{Measured\%}/\text{Spiked\%}) \times 100$$

## 7. Additional Discussion

Our mechanism for distinguishing D<sub>2</sub>O from H<sub>2</sub>O was based on their alkaline difference, and therefore the pH/pD values should be consistent for the used samples. As known, CO<sub>2</sub> can be easily adsorbed in either H<sub>2</sub>O or D<sub>2</sub>O, which is assumed as the major interference to the pH/pD values of pure H<sub>2</sub>O or D<sub>2</sub>O. In our sensing strategy, each H<sub>2</sub>O and/or D<sub>2</sub>O sample was degassed and measured under an N<sub>2</sub> atmosphere, which fully eliminated the artifacts induced by H<sub>2</sub>CO<sub>3</sub>. We would like to make some additional discussion as follows:

### 7.1 Evaluating the pH/pD Control of Used Samples

Firstly, we compared the HTI spectroscopy in a freshly opened D<sub>2</sub>O solution with that in a pretreated sample. Two parallel experiments were studied by using different branding D<sub>2</sub>O samples. For freshly opened D<sub>2</sub>O samples, different spectroscopies of HTI were noticed between different brands (Fig. S10a and S10c), while the spectra became consistent after these samples were treated with the degas technique (Fig. S10b and S10d). These results suggested

that the pH(pD) values of D<sub>2</sub>O were almost consistent in the samples used in our measurements.

Furthermore, we carried out three sets of parallel experiments: Measuring the spectra of **HTI** in three different batches of H<sub>2</sub>O and D<sub>2</sub>O samples which were stored in vessels of different brands. The very consistent absorption and emission spectra of **HTI** in either H<sub>2</sub>O or D<sub>2</sub>O were noticed in all three parallel experiments (Fig. S11), further confirming the consistent pH(pD) values of H<sub>2</sub>O or D<sub>2</sub>O samples could be obtained.

Even though all the above D<sub>2</sub>O and H<sub>2</sub>O samples were stored in different bottles, pretreated in different vessels, and measured separately, consistent results were obtained for either H<sub>2</sub>O or D<sub>2</sub>O. The results further demonstrated the reliability of our strategy.

## 7.2 D<sub>2</sub>O and H<sub>2</sub>O Samples at Different pH

Since the mechanism for distinguishing D<sub>2</sub>O from H<sub>2</sub>O is based on the alkaline difference between these two pure samples, these probes including our probe **HTI** and other previously reported probes<sup>3-5</sup> might not be suitable for the discrimination of D<sub>2</sub>O from H<sub>2</sub>O at different pH/pD values.

## 7.3 Buffered H<sub>2</sub>O and D<sub>2</sub>O Samples

**HTI** was studied in buffered H<sub>2</sub>O and D<sub>2</sub>O by using the same portion of buffer components of Na<sub>2</sub>HPO<sub>4</sub>-KH<sub>2</sub>PO<sub>4</sub> (10 mM, 1:1). As shown in Fig. S12, **HTI** displayed almost similar spectral properties in either buffered H<sub>2</sub>O or D<sub>2</sub>O.<sup>6</sup> This is because, unlike neat H<sub>2</sub>O and D<sub>2</sub>O that possess different pH/pD values, buffered D<sub>2</sub>O and H<sub>2</sub>O in Na<sub>2</sub>HPO<sub>4</sub>-KH<sub>2</sub>PO<sub>4</sub> displayed almost the same pH/pD value ( $\Delta\text{pH (D)} = 0.05$ , pH = 7.0) according to previous work from Rubinson's group. In this case, the buffered D<sub>2</sub>O and H<sub>2</sub>O in Na<sub>2</sub>HPO<sub>4</sub>-KH<sub>2</sub>PO<sub>4</sub> would not be suitable for our study on the discrimination of D<sub>2</sub>O from H<sub>2</sub>O.

### Advantages of this work:

In this work, H<sub>2</sub>O and D<sub>2</sub>O samples were degassed and protected with an N<sub>2</sub> atmosphere to fully eliminate the pH/pD variation induced by CO<sub>2</sub>-adsorption, which has been proven to provide consistent pH/pD values of each used sample. We believe this work could provide a more reliable method for discrimination and detection of D<sub>2</sub>O and H<sub>2</sub>O compared with previously reported probes (*Angew. Chem. Int., Ed.* 2019, 58, 6280–6284; *Chem. Commun.*, 2020, 56, 1191–1194; *Microchem. J.* 2022, 176, 107244.).

## Supplementary Figures and Tables

**Table S1.** Preparation of samples 1-8 for spiked recovery experiments.

| Sample                | 1                 | 2                 | 3                 | 4                 | 5                 | 6                 | 7                 | 8                 |
|-----------------------|-------------------|-------------------|-------------------|-------------------|-------------------|-------------------|-------------------|-------------------|
| (Total 2 mL)          |                   |                   |                   |                   |                   |                   |                   |                   |
| V <sub>H2O</sub> (mL) | 0.06              | 0.10              | 0.14              | 0.20              | 1.94              | 1.90              | 1.86              | 1.80              |
| V <sub>D2O</sub> (mL) | 1.94              | 1.90              | 1.86              | 1.80              | 0.06              | 0.10              | 0.14              | 0.20              |
| Spiked%               | 97.0 <sup>a</sup> | 95.0 <sup>a</sup> | 93.0 <sup>a</sup> | 90.0 <sup>a</sup> | 97.0 <sup>b</sup> | 95.0 <sup>b</sup> | 93.0 <sup>b</sup> | 90.0 <sup>b</sup> |

<sup>a</sup> V<sub>D2O</sub>/V<sub>D2O+H2O</sub>; <sup>b</sup> V<sub>H2O</sub>/V<sub>D2O+H2O</sub>.



**Table S2.** Comparison of reported organic optical sensors for D<sub>2</sub>O/H<sub>2</sub>O discrimination.

| Sensor                                                                                                        | LR <sup>a</sup><br>(vol%)                                                                                                                                                           | LOD<br>(vol%) <sup>b</sup><br>Trace H <sub>2</sub> O<br>in D <sub>2</sub> O | Solvent                                | Sensing response                                                                                                                                     | Detection interferenced<br>by CO <sub>2</sub> -induced pH<br>changes. | Reference        |
|---------------------------------------------------------------------------------------------------------------|-------------------------------------------------------------------------------------------------------------------------------------------------------------------------------------|-----------------------------------------------------------------------------|----------------------------------------|------------------------------------------------------------------------------------------------------------------------------------------------------|-----------------------------------------------------------------------|------------------|
| <b>NIM-2F</b><br>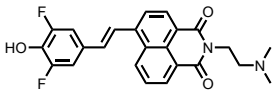            | 0 – 50.0                                                                                                                                                                            | 0.24                                                                        | DMSO/D <sub>2</sub> O<br>(20:3, v/v)   | Single-modal<br>Colorimetric changes                                                                                                                 | Yes                                                                   | [3]              |
| <b>AF</b><br>                | 0 – 47.1                                                                                                                                                                            | 0.080                                                                       | DMSO/D <sub>2</sub> O<br>(20:1.8, v/v) | Dual-modal<br>Ratiometric fluorescent/colorimetric<br>changes<br>I <sub>412 nm</sub> /I <sub>539 nm</sub> ; A <sub>344 nm</sub> /A <sub>513 nm</sub> | Yes                                                                   | [3]              |
| <b>CF-D<sub>2</sub>O</b><br> | 0 – 100                                                                                                                                                                             | 0.165 (I <sub>450</sub> )<br>1.05 (I <sub>550</sub> )                       | 0.33%<br>DMSO                          | Single-modal<br>Turn on response at I <sub>450 nm</sub> and I <sub>550 nm</sub>                                                                      | Yes                                                                   | [4]              |
| <b>ES</b><br>              | Only trace D <sub>2</sub> O or H <sub>2</sub> O was determined in DMSO and CH <sub>3</sub> CN, respectively. The<br>LOD of H <sub>2</sub> O in D <sub>2</sub> O was not determined. |                                                                             |                                        |                                                                                                                                                      | Yes                                                                   | [5]              |
| <b>HTI</b><br>             | 0 – 100                                                                                                                                                                             | 0.19                                                                        | 0.2% DMSO                              | Dual-modal<br>Ratiometric fluorescent<br>/colorimetric changes                                                                                       | No                                                                    | <b>This work</b> |

<sup>a</sup> LR: linear range; LOD: <sup>b</sup> Limit of detection.

**Table S3.** Photophysical properties of **HTI** and **MTI** in different solvents.

| Solution                      | <b>HTI</b>                     |                            |                                                | <b>MTI</b>                  |                            |                                                |
|-------------------------------|--------------------------------|----------------------------|------------------------------------------------|-----------------------------|----------------------------|------------------------------------------------|
|                               | $\lambda_{\text{abs}}$<br>(nm) | $\lambda_{\text{em}}$ (nm) | $\epsilon$ (cm <sup>-1</sup> M <sup>-1</sup> ) | $\lambda_{\text{abs}}$ (nm) | $\lambda_{\text{em}}$ (nm) | $\epsilon$ (cm <sup>-1</sup> M <sup>-1</sup> ) |
| H <sub>2</sub> O <sup>a</sup> | 420/520                        | 515/552                    | 33,700/30,400                                  | 416                         | 515                        | 22,800                                         |
| D <sub>2</sub> O <sup>a</sup> | 520                            | 558                        | 61,300                                         | 416                         | 515                        | 26,700                                         |
| pH = 3.00 <sup>b</sup>        | 420                            | 515                        | 38,700                                         | n.d. <sup>c</sup>           | n.d. <sup>c</sup>          | n.d. <sup>c</sup>                              |
| pH = 10.00 <sup>b</sup>       | 520                            | 558                        | 68,100                                         | n.d. <sup>c</sup>           | n.d. <sup>c</sup>          | n.d. <sup>c</sup>                              |

<sup>a</sup> Measured in degassed pure H<sub>2</sub>O or D<sub>2</sub>O; <sup>b</sup> Measured in B-R buffer; <sup>c</sup> Data are not detected.

**Table S4.** Fluorescence lifetimes of **HTI** (20  $\mu$ M) in D<sub>2</sub>O or H<sub>2</sub>O (containing 0.2% DMSO) at 298 K using a bi-exponential function.

|                               | Em     | $\tau_1$ /ps | Content% | $\tau_2$ /ps | Content% | $\chi^2$ |
|-------------------------------|--------|--------------|----------|--------------|----------|----------|
| D <sub>2</sub> O <sup>a</sup> | 515 nm | 53.87        | 90.87    | 710.5        | 9.13     | 1.75     |
|                               | 560 nm | 51.74        | 92.63    | 375.6        | 7.37     | 1.30     |
| H <sub>2</sub> O              | 515 nm | 42.75        | 91.81    | 233.9        | 8.19     | 1.35     |
|                               | 560 nm | 43.72        | 91.39    | 274.9        | 8.61     | 1.39     |

<sup>a</sup> Excited at  $\lambda_{\text{ex}} = 400$  nm and observed at  $\lambda_{\text{em}} = 515$  nm and  $\lambda_{\text{em}} = 560$  nm, respectively.

**Table S5.** Analysis of trace D<sub>2</sub>O and H<sub>2</sub>O based on the absorbance method.

| Sample <sup>a</sup>                                                     | Spiked%           | Measured%                | Recovery%   |
|-------------------------------------------------------------------------|-------------------|--------------------------|-------------|
| Trace H <sub>2</sub> O in D <sub>2</sub> O ( $V_{D_2O}/V_{D_2O+H_2O}$ ) |                   |                          |             |
| 1                                                                       | 97.0 <sup>b</sup> | 97.3±0.4810 <sup>b</sup> | 100.35±0.50 |
| 2                                                                       | 95.0 <sup>b</sup> | 94.6±0.2244 <sup>b</sup> | 99.63±0.24  |
| 3                                                                       | 93.0 <sup>b</sup> | 92.7±0.1409 <sup>b</sup> | 99.68±0.15  |
| 4                                                                       | 90.0 <sup>b</sup> | 90.4±0.6307 <sup>b</sup> | 100.49±0.70 |
| Trace D <sub>2</sub> O in H <sub>2</sub> O ( $V_{H_2O}/V_{D_2O+H_2O}$ ) |                   |                          |             |
| 5                                                                       | 97.0 <sup>c</sup> | 97.1±0.3956 <sup>c</sup> | 100.07±0.41 |
| 6                                                                       | 95.0 <sup>c</sup> | 95.0±0.0799 <sup>c</sup> | 100.05±0.08 |
| 7                                                                       | 93.0 <sup>c</sup> | 92.9±0.7348 <sup>c</sup> | 99.94±0.79  |
| 8                                                                       | 90.0 <sup>c</sup> | 90.9±0.6358 <sup>c</sup> | 100.97±0.70 |

<sup>a</sup> Measured in degassed H<sub>2</sub>O or D<sub>2</sub>O and each sample was measured three times; <sup>b</sup>  $V_{D_2O}/V_{D_2O+H_2O}$ ; <sup>c</sup>  $V_{H_2O}/V_{D_2O+H_2O}$ .

**Table S6.** Analysis of trace D<sub>2</sub>O and H<sub>2</sub>O based on the fluorescent method.

| Sample <sup>a</sup>                                                     | Spiked%           | Measured%                | Recovery%   |
|-------------------------------------------------------------------------|-------------------|--------------------------|-------------|
| Trace H <sub>2</sub> O in D <sub>2</sub> O ( $V_{D_2O}/V_{D_2O+H_2O}$ ) |                   |                          |             |
| 1                                                                       | 97.0 <sup>b</sup> | 97.2±0.3224 <sup>b</sup> | 100.22±0.36 |
| 2                                                                       | 95.0 <sup>b</sup> | 94.3±0.1780 <sup>b</sup> | 99.27±0.20  |
| 3                                                                       | 93.0 <sup>b</sup> | 92.6±0.1048 <sup>b</sup> | 99.52±0.12  |
| 4                                                                       | 90.0 <sup>b</sup> | 89.7±0.5456 <sup>b</sup> | 99.68±0.61  |
| Trace D <sub>2</sub> O in H <sub>2</sub> O ( $V_{H_2O}/V_{D_2O+H_2O}$ ) |                   |                          |             |
| 5                                                                       | 97.0 <sup>c</sup> | 97.2±0.3224 <sup>c</sup> | 100.22±0.36 |
| 6                                                                       | 95.0 <sup>c</sup> | 94.3±0.1780 <sup>c</sup> | 99.27±0.20  |
| 7                                                                       | 93.0 <sup>c</sup> | 92.6±0.1048 <sup>c</sup> | 99.52±0.12  |
| 8                                                                       | 90.0 <sup>c</sup> | 89.7±0.5456 <sup>c</sup> | 99.68±0.61  |

<sup>a</sup> Measured in degassed H<sub>2</sub>O or D<sub>2</sub>O and each sample was measured three times; <sup>b</sup>  $V_{D_2O}/V_{D_2O+H_2O}$ ; <sup>c</sup>  $V_{H_2O}/V_{D_2O+H_2O}$ .

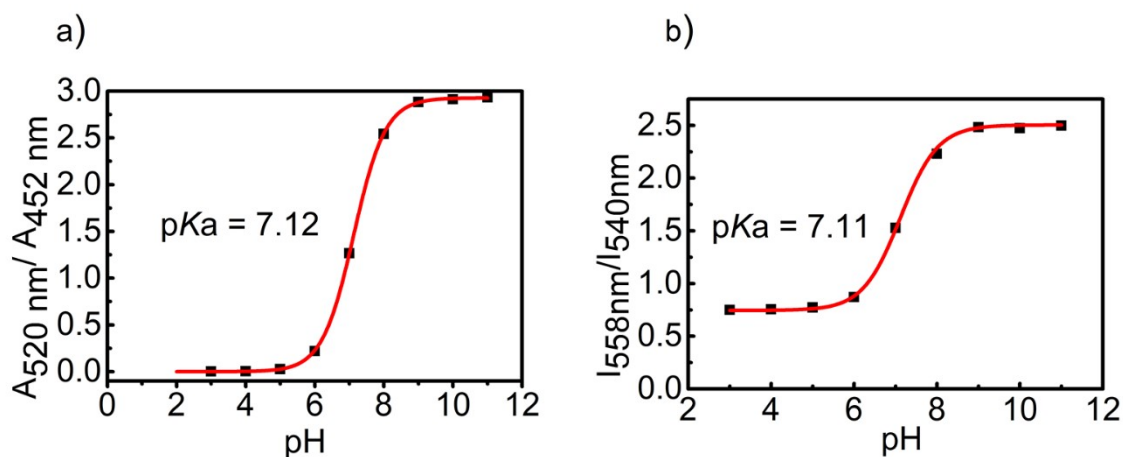

**Fig. S1.** The relationship of (a) absorption ratio ( $A_{520\text{ nm}}/A_{452\text{ nm}}$ ) and (b) fluorescence ratio ( $I_{558\text{ nm}}/I_{540\text{ nm}}$ ) versus pH values.

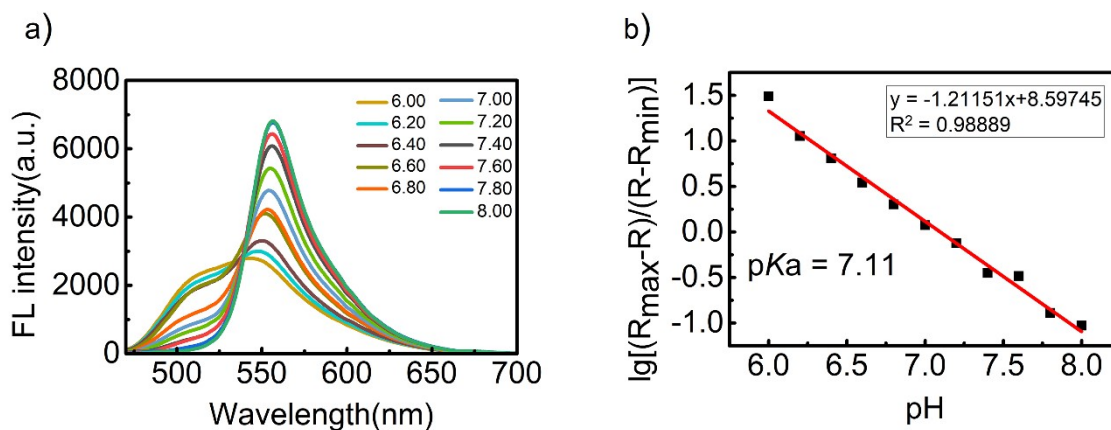

**Fig. S2.** (a) Fluorescence spectra of **HTI** ( $20\ \mu\text{M}$ ) in B-R buffer (0.2% DMSO) at various pH values (6.0–8.0); (b) Linear relationship between  $\lg[(R_{\text{max}}-R)/(R-R_{\text{min}})]$  and pH values in the range of 6.0 – 8.0;  $R = I_{558\text{ nm}}/I_{540\text{ nm}}$ .

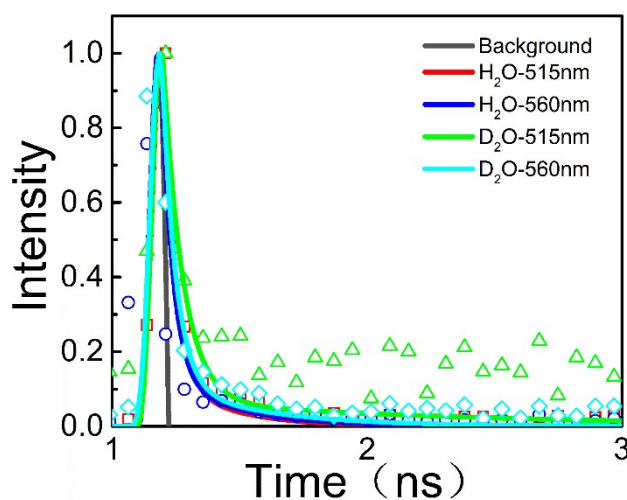

**Fig. S3.** Fluorescence decay curves of **HTI** ( $20\ \mu\text{M}$ ) in  $\text{D}_2\text{O}$  or  $\text{H}_2\text{O}$  (containing 0.2% DMSO) at 298 K ( $\lambda_{\text{ex}} = 400\text{ nm}$ ).

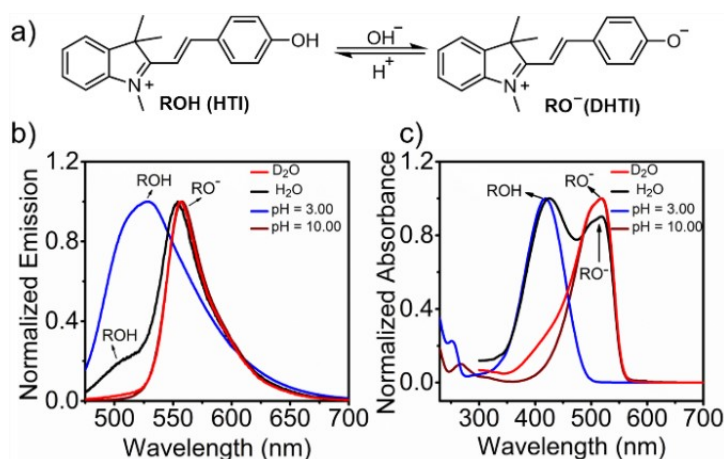

**Fig. S4.** (a) Proton transfer equilibrium of **HTI** in basic and acidic solutions; (b) Normalized steady-state emission and (c) absorbance spectra of **HTI** (20  $\mu\text{M}$ ) in degassed  $\text{D}_2\text{O}$ ,  $\text{H}_2\text{O}$  and in solutions with  $\text{pH} = 3.00$  and  $10.00$ , containing 0.2% DMSO respectively. Slit: 10 nm/10 nm.

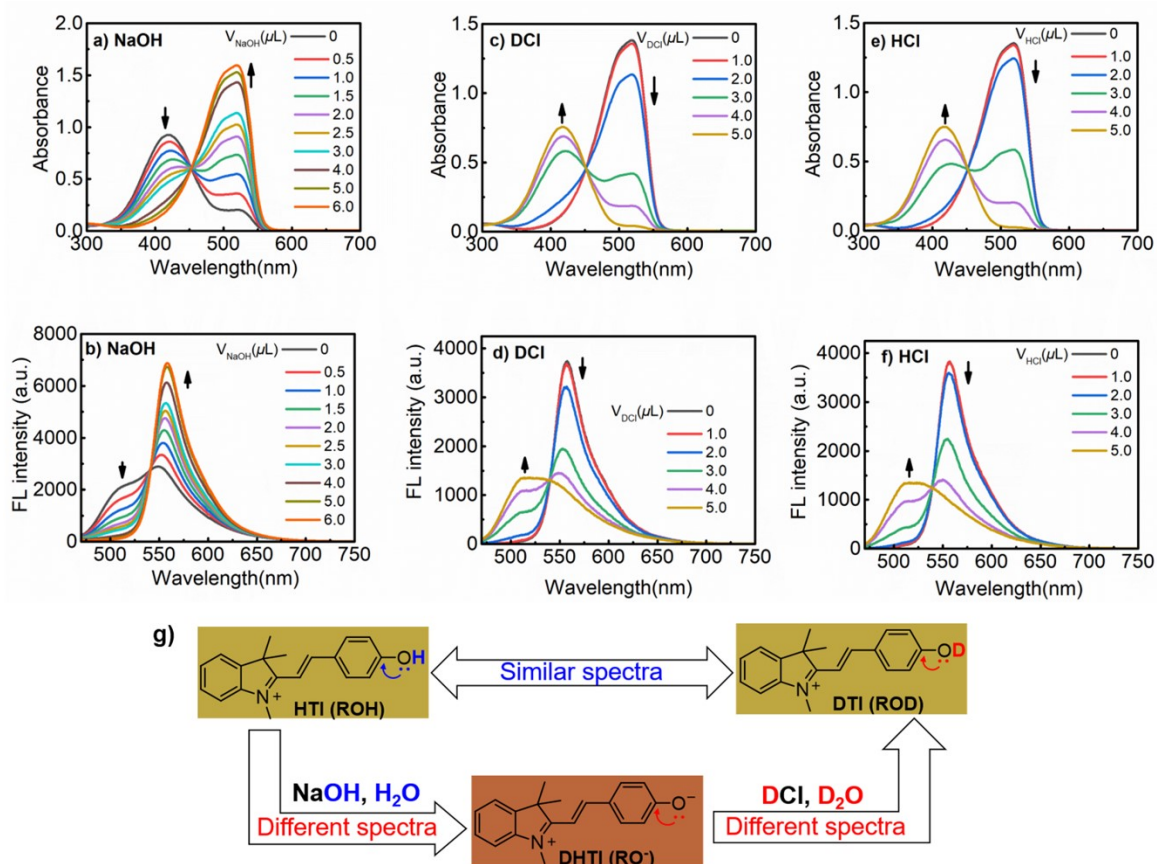

**Fig. S5.** (a) Absorption and (b) fluorescence spectra of **HTI** (20  $\mu\text{M}$ ) in  $\text{H}_2\text{O}$  (0.2% DMSO) with addition of 0.1 M NaOH (0 – 6  $\mu\text{L}$ ), Slit: 10 nm/10 nm; (c) Absorption spectra and (d) fluorescence spectra of **HTI** (20  $\mu\text{M}$ ) in  $\text{D}_2\text{O}$  (0.2% DMSO) with addition of 0.1 M DCl (0 – 5  $\mu\text{L}$ ), Slit: 5 nm/5 nm; (e) UV-vis absorption spectra and (f) fluorescence spectra of sensor **HTI** (20  $\mu\text{M}$ ) in  $\text{D}_2\text{O}$  (0.2% DMSO) with addition of 0.1 M HCl (0 – 5  $\mu\text{L}$ ), Slit: 5 nm/5 nm; (g) Diagram of related structure transformation.

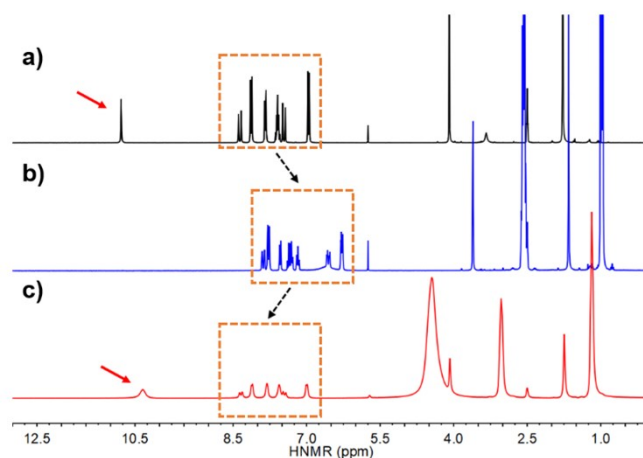

**Fig. S6.**  $^1\text{H}$  NMR spectra of **HTI** (0.037 mmol) was conducted in (a)  $\text{DMSO-}d_6$ , (b) **HTI** with 10 eq.  $\text{Et}_3\text{N}$  (0.37 mmol,  $51.3 \mu\text{L}$ ) in  $\text{DMSO-}d_6$ , and (c) introduce 20 eq.  $\text{HCl}$  (0.74 mmol,  $64.5 \mu\text{L}$ ) into sample b.

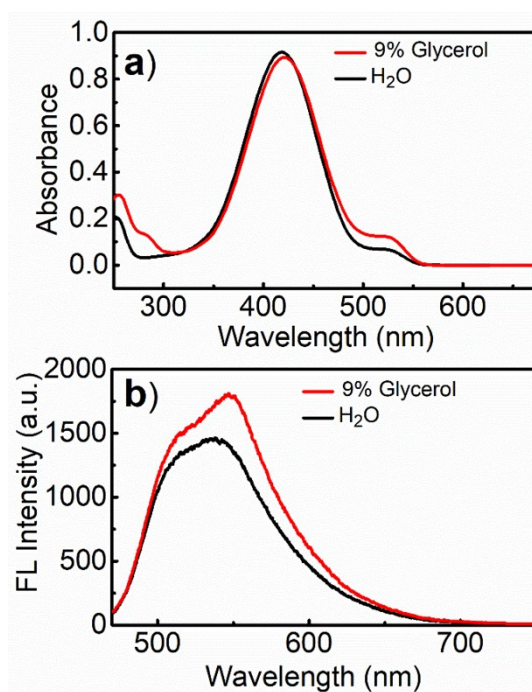

**Fig. S7.** (a) UV-vis absorption spectra and (b) emission spectra of sensor **HTI** ( $20 \mu\text{M}$ ) in  $\text{H}_2\text{O}$  (0.2%  $\text{DMSO}$ ) and 9% glycerol (0.2%  $\text{DMSO}$ ).

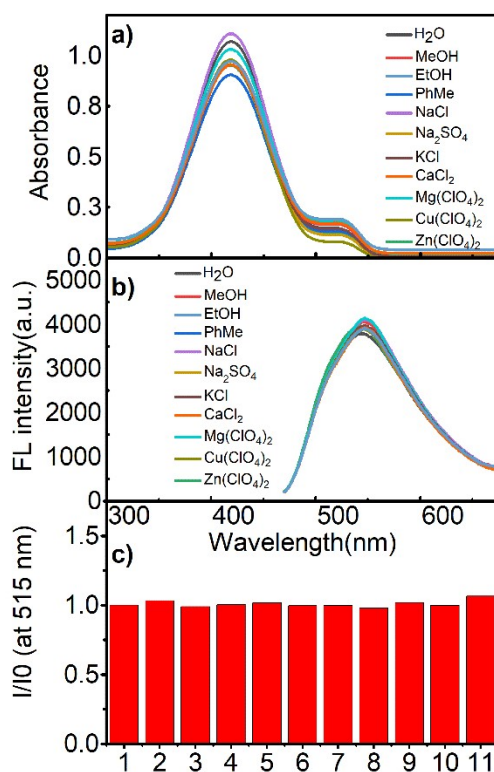

**Fig. S8.** (a) Absorption and (b) fluorescence spectra of **HTI** (20 μM) in the absence and presence of the other common species (10 eq., 200 μM) in H<sub>2</sub>O (0.2% DMSO). (c) Fluorescence responses of sensor **HTI** (20 μM) to common species in H<sub>2</sub>O (0.2% DMSO). Bars represent the ratio of the fluorescence intensity in the presence (I) and absence (I<sub>0</sub>) of analytes. From 1 to 11: H<sub>2</sub>O, MeOH, EtOH, PhMe, NaCl, Na<sub>2</sub>SO<sub>4</sub>, KCl, CaCl<sub>2</sub>, Mg(ClO<sub>4</sub>)<sub>2</sub>, Cu(ClO<sub>4</sub>)<sub>2</sub>, Zn(ClO<sub>4</sub>)<sub>2</sub>. Ex = 452 nm.

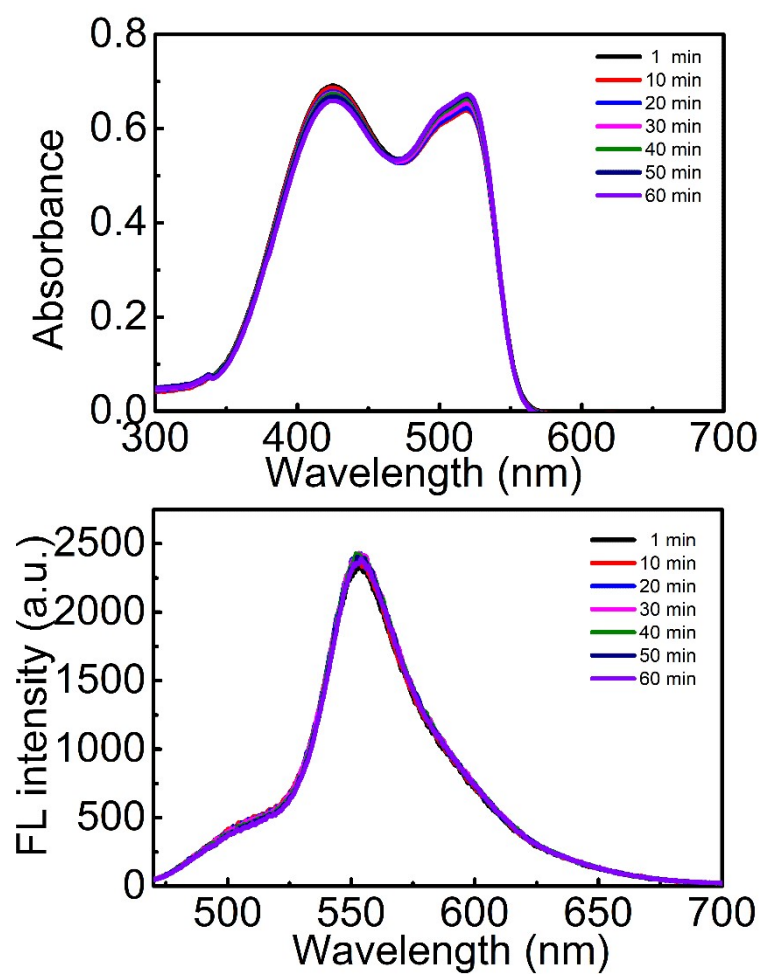

**Fig. S9.** Fluorescence stability of HTI (20  $\mu$ M) in degassed H<sub>2</sub>O (containing 0.2% DMSO). Ex = 452 nm.



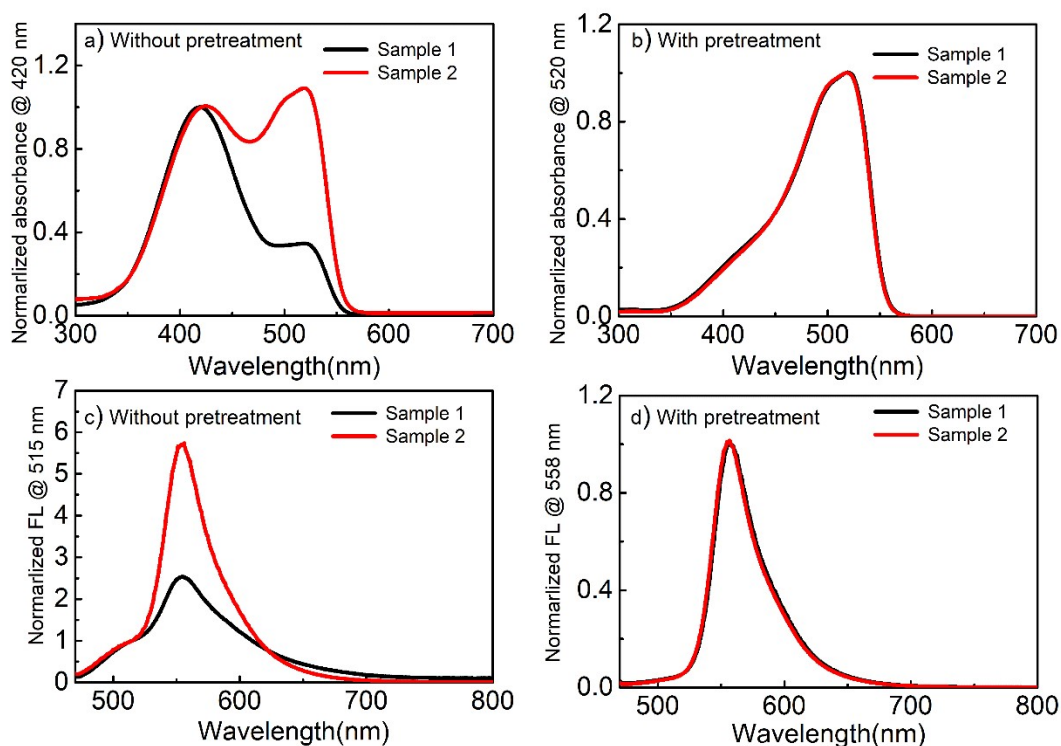

**Fig. S10:** Normalized absorption (a, b) and fluorescence spectra (c, d) of **HTI** ( $20 \mu\text{M}$ ) in  $\text{D}_2\text{O}$  (0.2% DMSO) sample 1 (from Energy, China) and sample 2 (from Adamas, China). (a) and (c) represented the sample without pre-treatment and (b) and (d) represented the distilled samples with degas and protection with  $\text{N}_2$ .

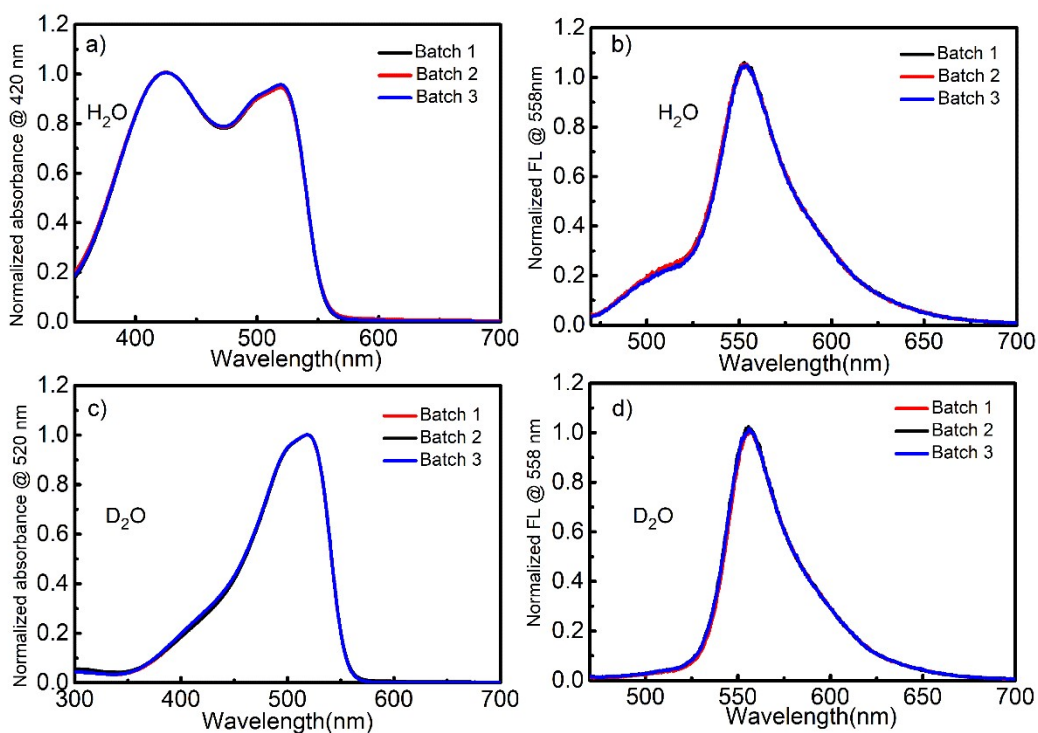

**Fig. S11.** Consistent absorption (a, c) and emission (b, d) spectra of **HTI** ( $20 \mu\text{M}$ ) from different batches of degassed  $\text{H}_2\text{O}$  and  $\text{D}_2\text{O}$ , containing 0.2% DMSO. Ex = 452 nm.

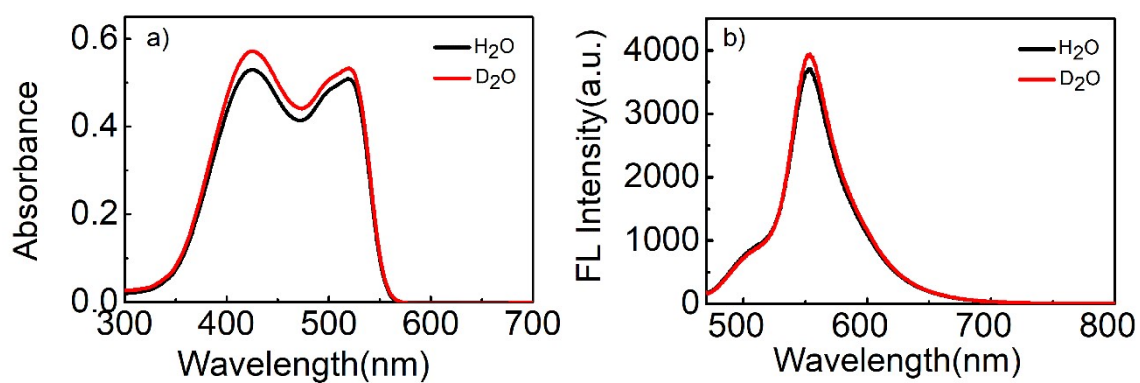

**Fig. S12.** (a) Absorption and (b) fluorescence spectra of **HTI** (20  $\mu$ M) in Na<sub>2</sub>HPO<sub>4</sub>-KH<sub>2</sub>PO<sub>4</sub> (10 mM, Na<sub>2</sub>HPO<sub>4</sub> : KH<sub>2</sub>PO<sub>4</sub> = 1:1) buffer solution in H<sub>2</sub>O (black line) and D<sub>2</sub>O (red line).

# Display Report

## Analysis Info

Analysis Name D:\Data\fanglei\XY-13-2\_RD2\_01\_4798.d  
Method 1225-1.m  
Sample Name XY-13-2  
Comment

Acquisition Date 4/27/2021 4:40:24 PM

Operator Demo User  
Instrument impact II 1825265.10256

## Acquisition Parameter

|             |            |                      |          |                  |           |
|-------------|------------|----------------------|----------|------------------|-----------|
| Source Type | ESI        | Ion Polarity         | Positive | Set Nebulizer    | 0.4 Bar   |
| Focus       | Not active | Set Capillary        | 2600 V   | Set Dry Heater   | 180 °C    |
| Scan Begin  | 50 m/z     | Set End Plate Offset | -500 V   | Set Dry Gas      | 4.0 l/min |
| Scan End    | 1300 m/z   | Set Charging Voltage | 2000 V   | Set Divert Valve | Source    |
|             |            | Set Corona           | 0 nA     | Set APCI Heater  | 0 °C      |

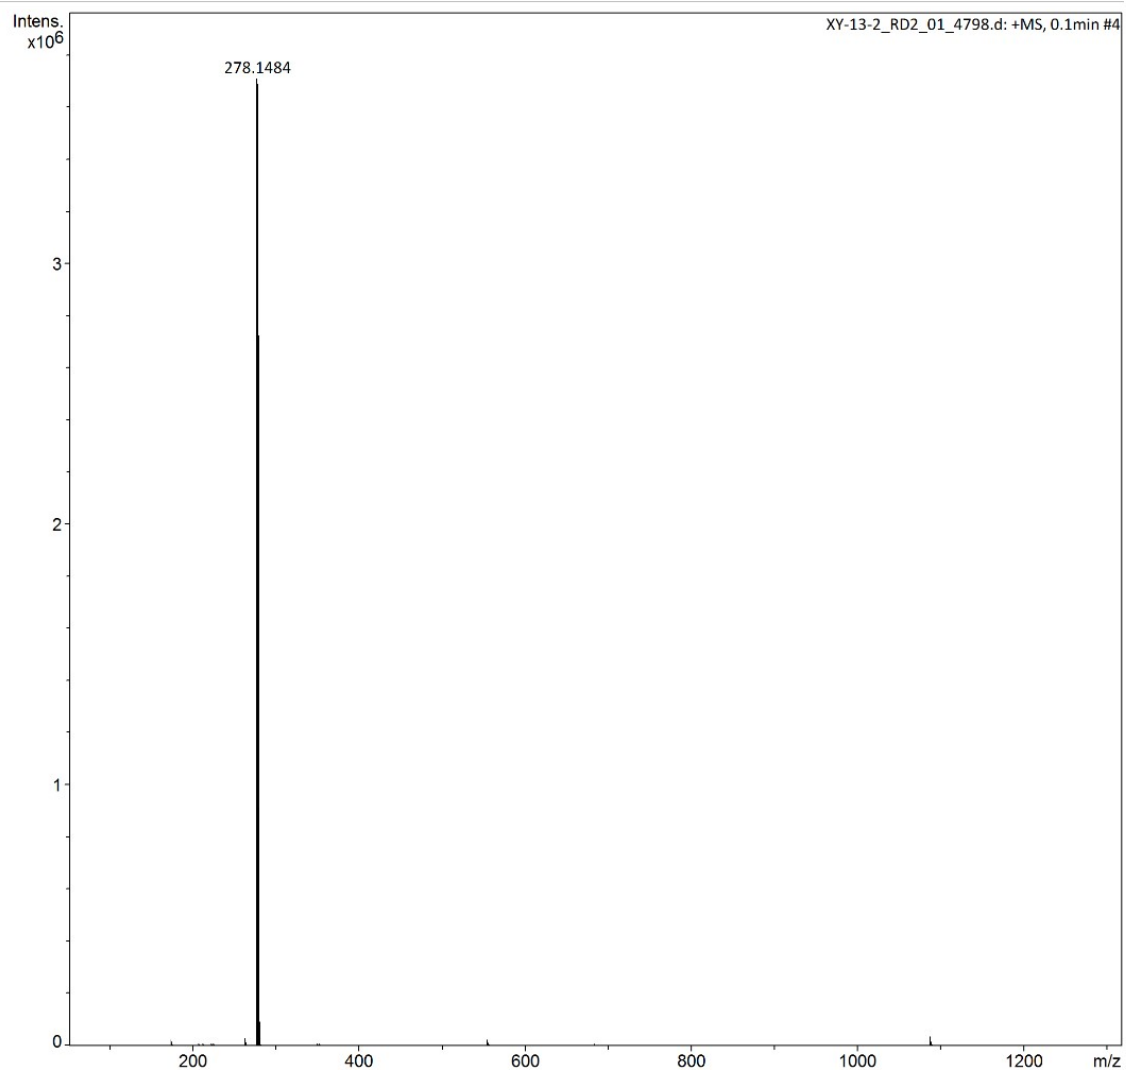

XY-13-2\_RD2\_01\_4798.d

Bruker Compass DataAnalysis 4.4

printed: 5/18/2021 4:44:52 PM

by: demo

Page 1 of 1

**Fig. S13.** ESI-MS spectra of HTI.

## References

1. a) X. Wang, C. Gu, H. Zheng, Y.-M. Zhang, S. X.-A. Zhang, *Chem. Asian J.* **2018**, *13*, 1206; b) S.-P. Wang, W.-J. Deng, D. Sun, M. Yan, H. Zheng, J.-G. Xu, *Org. Biomol. Chem.* **2009**, *7*, 4017.
2. a) A. Perry, *Org. Biomol. Chem.* **2019**, *17*, 4825; b) J. Gu, U. R. Anumala, F. L. Monte, T. Kramer, H. R. Haußen, J. Hölzer, V. Goetschy-Meyer, G. Mall, I. Hilger, C. Czech, B. Schmidt. *Bioorg. Med. Chem. Lett.* **2012**, *22*, 7667.
3. Y. Luo, C. Li, W. Zhu, X. Zheng, Y. Huang and Z. Lu, *Angew. Chem. Int., Ed.* **2019**, *58*, 6280.
4. B. Dong, Y. Lu, W. Song, X. Kong, Y. Sun, W. Lin, *Chem. Commun.* **2020**, *56*, 1191.
5. S. Gadiyaram, P. Kumar, A. Singh, D.A. Jose, *Microchem. J.* **2022**, *176*, 107244.
6. K. A. Rubinson, *Anal. Methods*, **2017**, *9*, 2744.
